# Supplementary material
Source: publisher site journal article supplement (http://www.spandidos-publications.com/1987/downloadSupplementary)

Figure S1. N13.3 affects the apoptosis, colony formation, migration and invasion of CRC cells. (A) Knockdown of N13.3 promoted the apoptosis of CRC HT-29 and HCT-116 cells. (B) Colony formation, migration and invasion capabilities were promoted in CRC cells transfected with miR-4722-3p ASO, but the promotion was reversed due to the knockdown of N13.3. (C) The effect of high expression of N13.3 and miR-4722-3p in regards to colony formation, migration and invasion capabilities of CRC cells. (D and E) The overexpression or knockdown efficiency of miR-4722-3p was analyzed by qPCR in CRC cells transfected with miR-4722-3p mimics or miR-4722-3p ASO. \* $P < 0.05$  and \*\* $P < 0.01$ , compared with the mimics NC or ASO NC group. Data are expressed as the Means  $\pm$  SD. Statistical analysis was conducted using Student's t-test. \* $P < 0.05$  and \*\* $P < 0.01$ . N13.3, RP11-400N13.3; CRC, colorectal cancer.

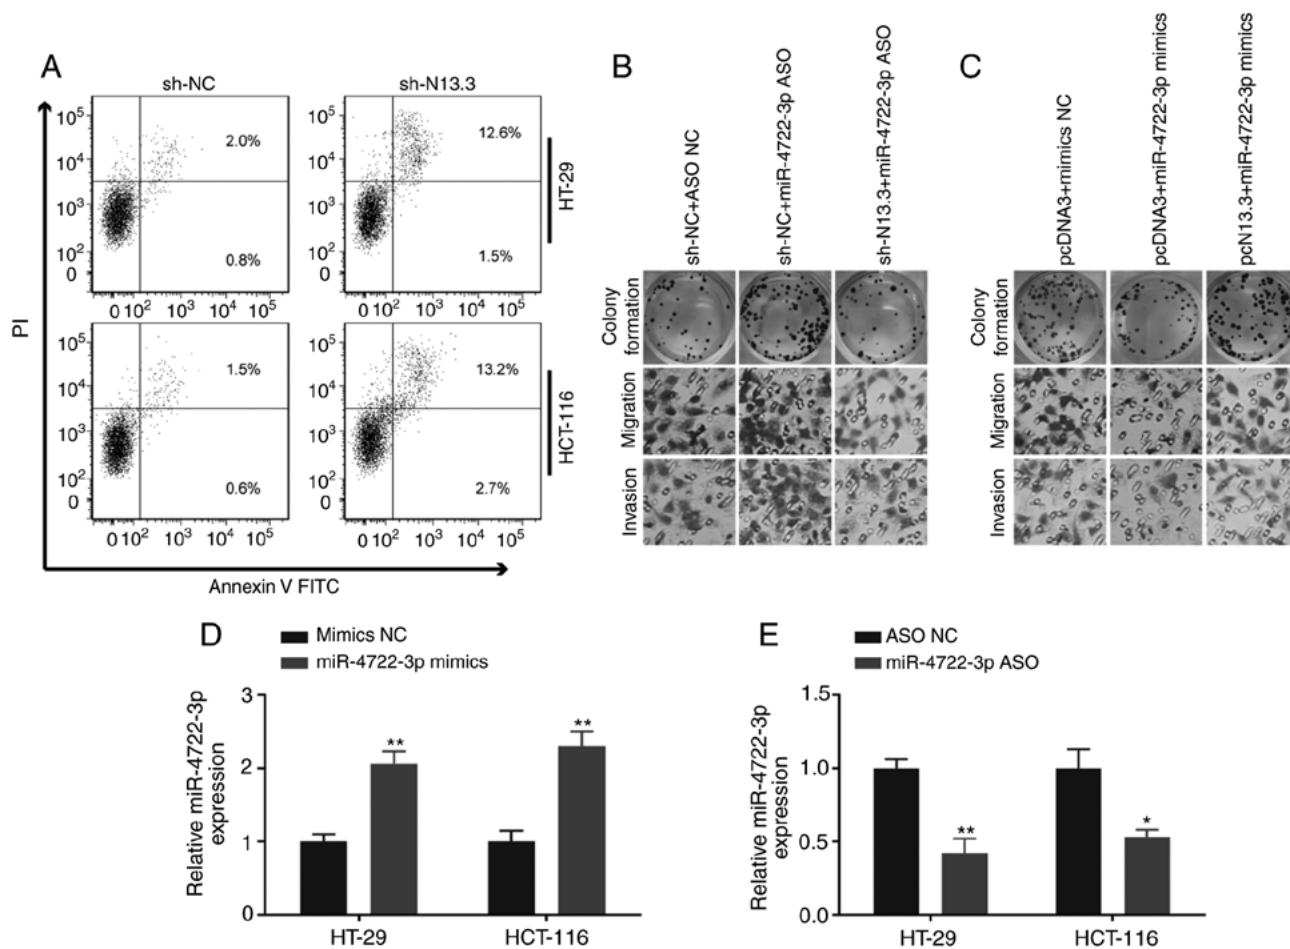

Supplement: Supplementary file 1 [file downloadSupplementary]
